# Supplementary material
Source: PubMed Central journal article supplement (PMC7116578)
Supplement: EMS82979-supplement-Supplementary_1.pdf [file EMS82979-supplement-Supplementary_1.pdf]

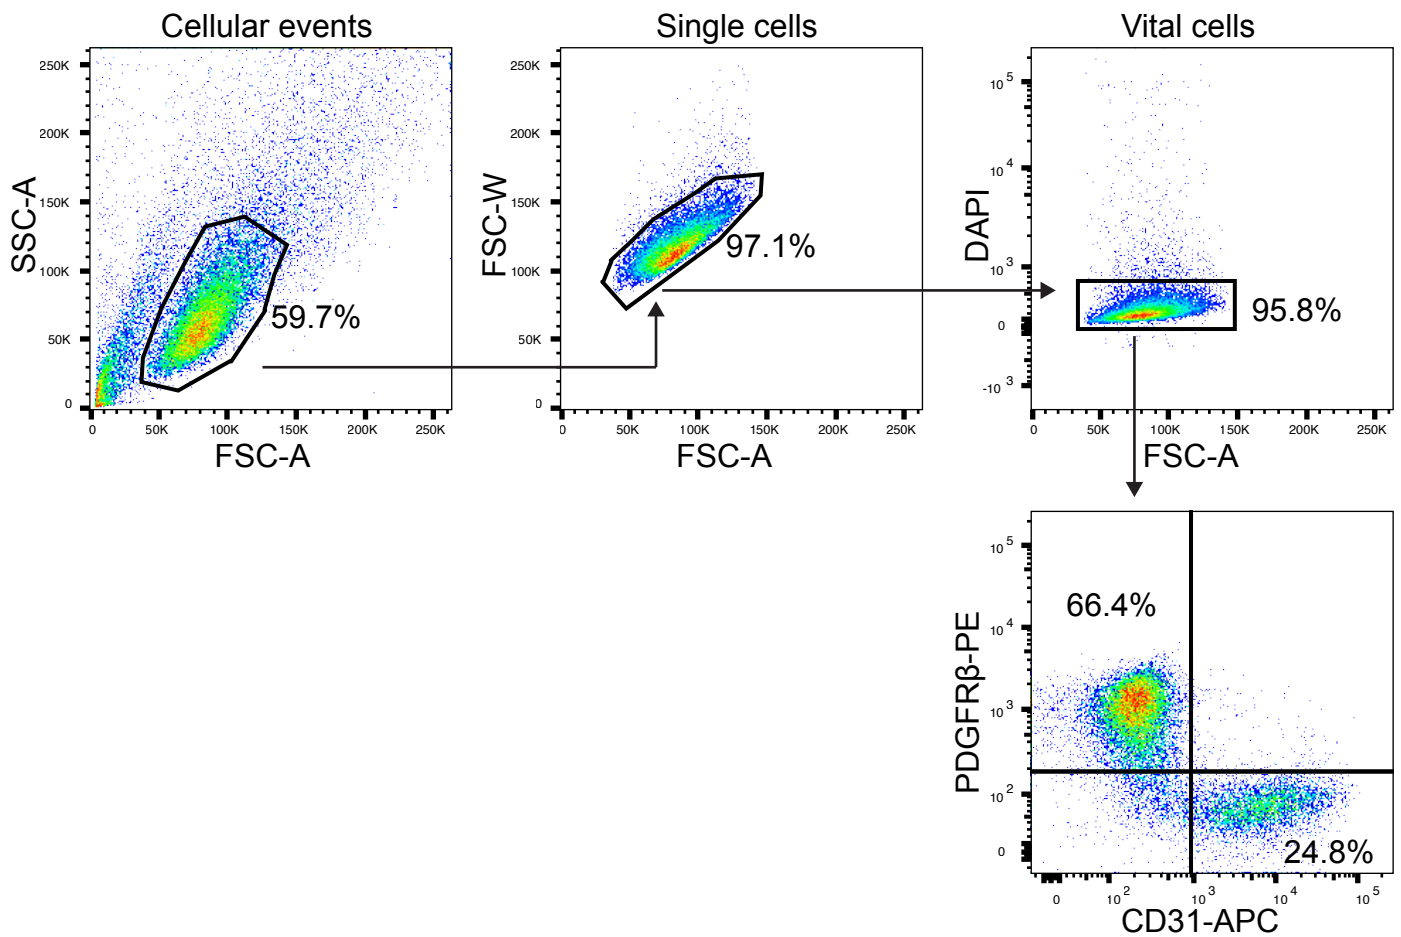

**Supplementary Figure 3. Flow cytometry gating strategies.**

Representative FACS plots show the gating strategy of vascular organoid-derived cells. Debris (top left), doublets (top middle) and dead cells (DAPI, top right) were excluded from the analysis. Vital cells (DAPI negative) were analysed for e.g. endothelial (CD31) or pericyte (PDGFR $\beta$ ) marker expression (lower right).
