# Supplementary material
Source: PubMed Central journal article supplement (PMC7116578)

# Notch3

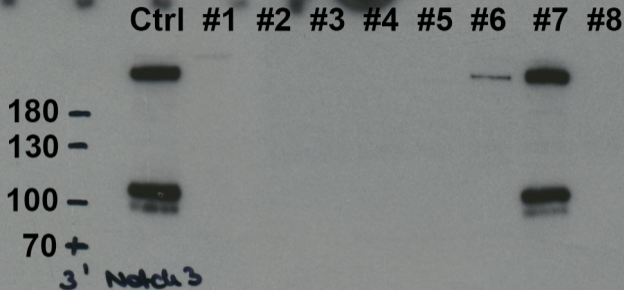

① GAPDH - HRP coupled; 1:2000

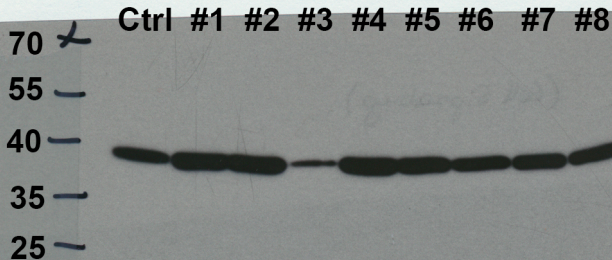

3' Notch3; GAPDH

Supplement: EMS82979-supplement-Supplementary_2.pdf [file EMS82979-supplement-Supplementary_2.pdf]
